# Supplementary material for: Properties and Degradation Performances of Biodegradable Poly(lactic acid)/Poly(3-hydroxybutyrate) Blends and Keratin Composites
Source: MDPI journal article supplement (doi:10.3390/polym13162693), 2021-08-12
Supplement: s1 [file s1]

## Supporting Information

### Properties and Degradation Performances of Biodegradable Poly(lactic acid)/poly(3-hydroxybutyrate) Blends and Keratin Composites.

Danko M.<sup>1,\*</sup>, Mosnáčková K.<sup>1</sup>, Vykydalová A.<sup>1</sup>, Kleinová A.<sup>1</sup>, Puškárová A.<sup>2</sup>, Pangallo D.<sup>2</sup>, Bujdoš, M.<sup>3</sup>, Mosnáček J.<sup>1,4</sup>.

<sup>1</sup> Polymer Institute, Slovak Academy of Sciences, Dúbravská cesta 9, 845 41 Bratislava, Slovakia

<sup>2</sup> Institute of Molecular Biology, Slovak Academy of Sciences, Dúbravská cesta 21, 845 51 Bratislava, Slovakia;

<sup>3</sup> Institute of Laboratory Research on Geomaterials, Faculty of Natural Sciences, Comenius University in Bratislava, Mlynská dolina, 842 15 Bratislava, Slovakia;

<sup>4</sup> Centre for Advanced Materials Application, Slovak Academy of Sciences, Dúbravská cesta 9, 845 11 Bratislava, Slovakia;

\* corresponding author: martin.danko@savba.sk

#### Content:

1. **Figure S1:** Optical microscopy pictures of PLA/PHB/ATBC neat polymer matrix, keratin filler and PLA/PHB/ATBC/keratin composites with 1, 5, 10 and 20 wt% of keratin filler content at 150× magnification.
2. **Table S1:** Molecular characteristics of PLA/PHB, PLA/PHB/ATBC neat matrices and composites with varying keratin content from 1 to 20 wt%.
3. **Table S2:** Parameters obtained from DSC records of PLA/PHB and PLA/PHB/ATBC neat foils and keratin composites with varying keratin content from 1 to 20 wt% prepared by hot-pressing procedure.
4. **Figure S2:** DSC second heating run of PLA/PHB and PLA/PHB/ATBC neat foils and keratin composites with varying keratin content from 1 to 20 wt% prepared by hot-pressing procedure.
5. **Figure S3:** TGA and DTG curves of PLA, PHB and Keratin bare materials.
6. **Figure S4:** <sup>1</sup>H NMR spectra of PLA/PHB/ATBC/K-5 composite with 5 wt% of keratin in matrix before (upper) and after hydrolysis in 0.01 M NaOH (36 days, 78% extractable products) (down).
7. **Table S3:** Parameters obtained from DSC records of PLA/PHB/ATBC neat foil and keratin composites with varying keratin content from 5 to 20 wt% at the end of hydrolysis.
8. **Figure S5:** DSC second heating run of PLA/PHB/ATBC neat foil and keratin composites with varying keratin content from 5 to 20 wt% at the end of hydrolysis.
9. **Figure S6:** Average number molar masses of PLA/PHB/ATBC blend and its composites with varying keratin content from 1 to 20 wt% before and after the 1 month microbial test.

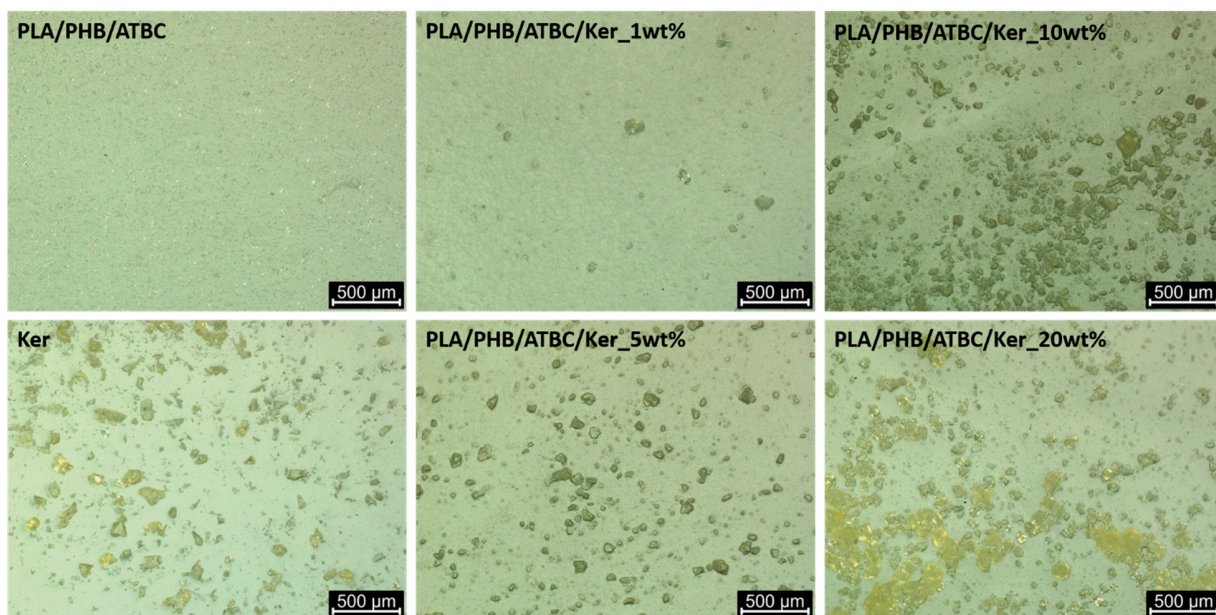

**Figure S1:** Optical microscopy pictures of PLA/PHB/ATBC neat polymer matrix, keratin filler and PLA/PHB/ATBC/keratin composites with 1, 5, 10 and 20 wt% of keratin filler content at  $150\times$  magnification.

**Table S1:** Molecular characteristics of PLA/PHB, PLA/PHB/ATBC neat matrices and composites with varying keratin content from 1 to 20 wt%.

| Sample                   | Casted                                        |                                                      | Compression-molded                            |                                                      |
|--------------------------|-----------------------------------------------|------------------------------------------------------|-----------------------------------------------|------------------------------------------------------|
|                          | as prepared<br>$M_n, M_w, Đ$<br>$g\ mol^{-1}$ | treated 80°C, 16 h<br>$M_n, M_w, Đ$<br>$g\ mol^{-1}$ | as prepared<br>$M_n, M_w, Đ$<br>$g\ mol^{-1}$ | treated 80°C, 16 h<br>$M_n, M_w, Đ$<br>$g\ mol^{-1}$ |
| PLA/PHB                  | 47 100, 100 500<br>2.13                       | 51 200, 115 000<br>2.25                              | 44 200, 93 800<br>2.11                        | 43 700, 91 800<br>2.10                               |
| PLA/PHB/ATBC             | 45 700, 93 400<br>2.05                        | 45 400, 93 100<br>2.05                               | 43 200, 92 000<br>2.11                        | 43 600, 90 100<br>2.07                               |
| PLA/PHB/ATBC/<br>K-1wt%  | 42 700, 89 600<br>2.10                        | 45 400, 89 300<br>1.97                               | 43 200, 83 000<br>1.91                        | 42 500, 88 300<br>2.08                               |
| PLA/PHB/ATBC/<br>K-3wt%  | 43 700, 86 100<br>1.97                        | 44 000, 89 400<br>2.03                               | 37 300, 82 400<br>2.21                        | 39 800, 90 100<br>2.26                               |
| PLA/PHB/ATBC/<br>K-5wt%  | 41 100, 88 200<br>2.15                        | 38 500, 82 300<br>2.14                               | 34 300, 82 800<br>2.41                        | 38 200, 82 600<br>2.16                               |
| PLA/PHB/ATBC/<br>K-10wt% | 36 100, 72 200<br>2.00                        | 37 800, 80 300<br>2.12                               | 33 200, 79 800<br>2.40                        | 35 900, 83 000<br>2.31                               |
| PLA/PHB/ATBC/<br>K-20wt% | 31 500, 66 000<br>2.09                        | 32 900, 76 900<br>2.34                               | 28 300, 64 200<br>2.27                        | 27 000, 64 800<br>2.40                               |

**Table S2:** Parameters obtained from DSC records of PLA/PHB and PLA/PHB/ATBC neat foils and keratin composites with varying keratin content from 1 to 20 wt% prepared by compression-molding procedure.

| Sample            | $T_g$<br>(°C) | $T_{cc}$<br>(°C) | $T_m$<br>(°C) | $\Delta H_{m1}$<br>(J g <sup>-1</sup> ) | $\Delta H_{m2}$<br>(J g <sup>-1</sup> ) | $\chi_c$ (%) |
|-------------------|---------------|------------------|---------------|-----------------------------------------|-----------------------------------------|--------------|
| PLA/PHB           | 51.3          | 121.5            | 149.1/170.7   | 36.25                                   | 33.46                                   | 35.88        |
| PLA/PHB/ATBC      | 32.4          | 99.3             | 148.2/167.6   | 34.53                                   | 31.46                                   | 34.18        |
| PLA/PHB/ATBC/K-1  | 30.1          | 103.0            | 141.2/167.0   | 33.17                                   | 33.65                                   | 32.83        |
| PLA/PHB/ATBC/K-3  | 29.3          | 96.9             | 147.5/165.9   | 38.55                                   | 38.33                                   | 38.16        |
| PLA/PHB/ATBC/K-5  | 30.9          | 98.1             | 147.7/166.7   | 35.17                                   | 33.63                                   | 34.81        |
| PLA/PHB/ATBC/K-10 | 30.7          | 97.5             | 147.7/166.3   | 34.65                                   | 37.66                                   | 34.30        |
| PLA/PHB/ATBC/K-20 | 26.5          | 93.2             | 146.7/165.1   | 31.53                                   | 35.32                                   | 31.21        |

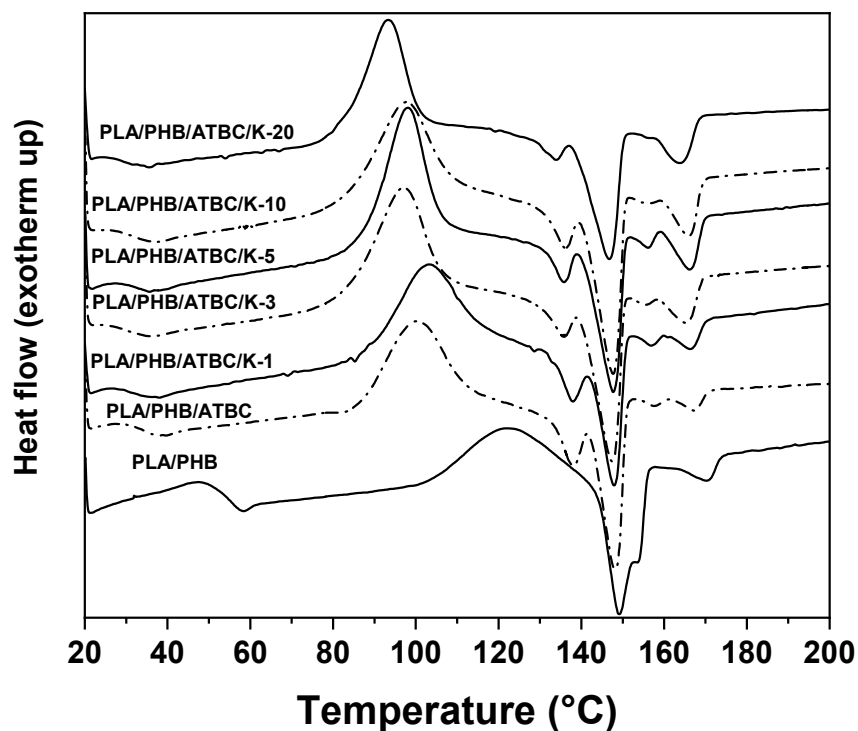

**Figure S2:** DSC second heating run of PLA/PHB and PLA/PHB/ATBC neat foils and keratin composites with varying keratin content from 1 to 20 wt% prepared by compression-molding procedure.

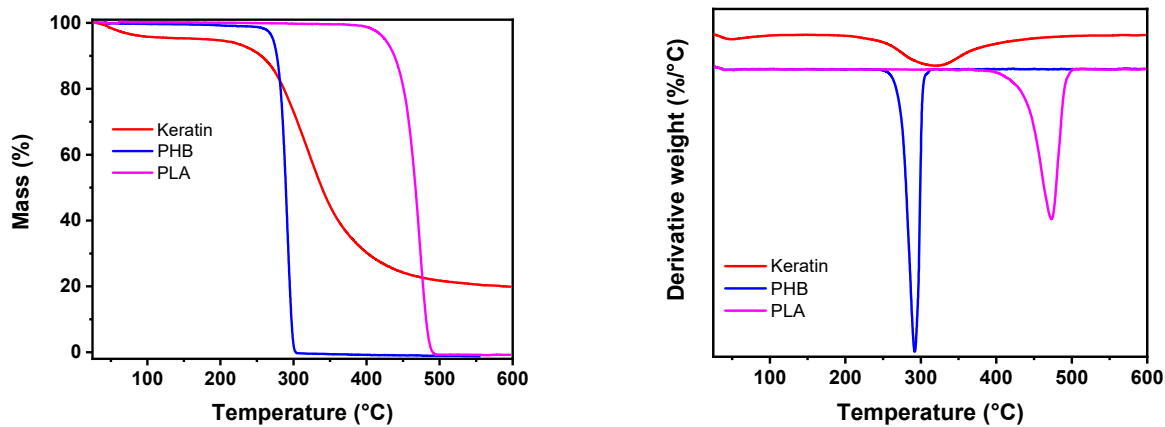

**Figure S3:** TGA and DTG curves of PLA, PHB and keratin bare materials.

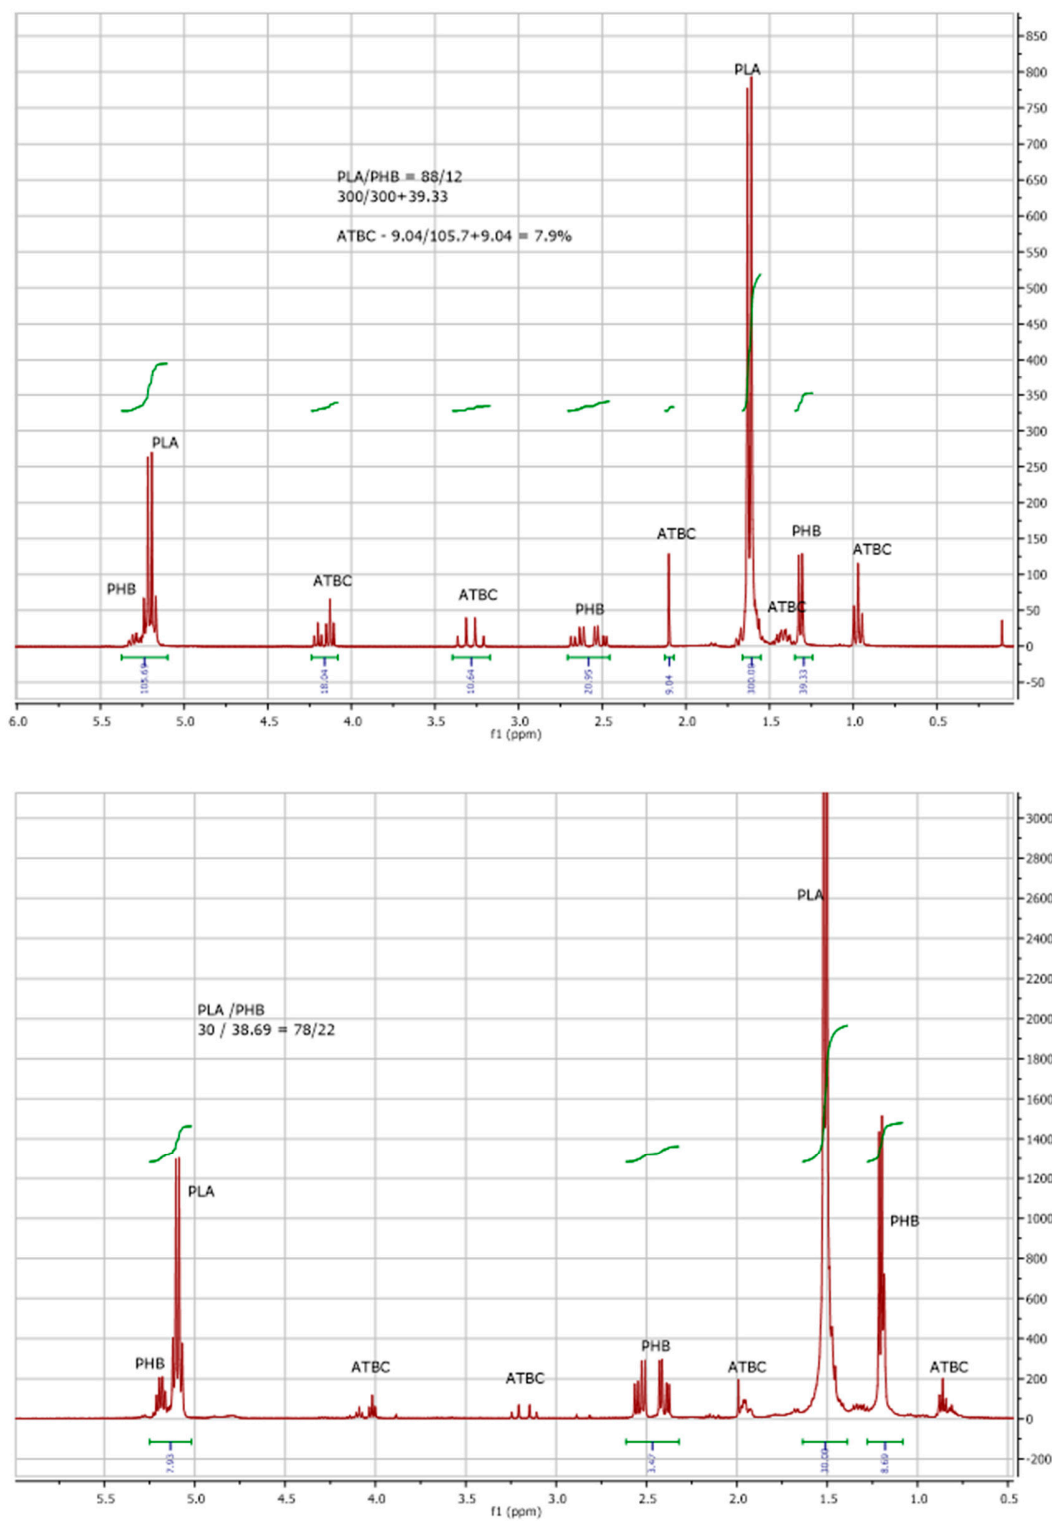

**Figure S4:**  $^1\text{H}$  NMR spectra of of PLA/PHB/ATBC/K-5 composite with 5 wt% of keratin in matrix before (upper) and after hydrolysis in 0.01 M NaOH (36 days, 78% extractable products) (down).

**Table S3:** Parameters obtained from DSC records of PLA/PHB/ATBC neat foil and keratin composites with varying keratin content from 5 to 20 wt% at the end of hydrolysis.

| Sample            | $T_g$<br>(°C) | $T_m$<br>(°C) | $\Delta H_{m1}$<br>(J g <sup>-1</sup> ) | $\chi_c$ (%) |
|-------------------|---------------|---------------|-----------------------------------------|--------------|
| PLA/PHB/ATBC      | 54.9          | 149.6/164.3   | 34.53                                   | 49.31        |
| PLA/PHB/ATBC/K-5  | 52.6          | 150.1/165.6   | 49.82                                   | 50.11        |
| PLA/PHB/ATBC/K-10 | 52.5          | 150.2/163.5   | 50.63                                   | 47.63        |
| PLA/PHB/ATBC/K-20 | 51.6          | 148.9/161.6   | 48.12                                   | 36.80        |

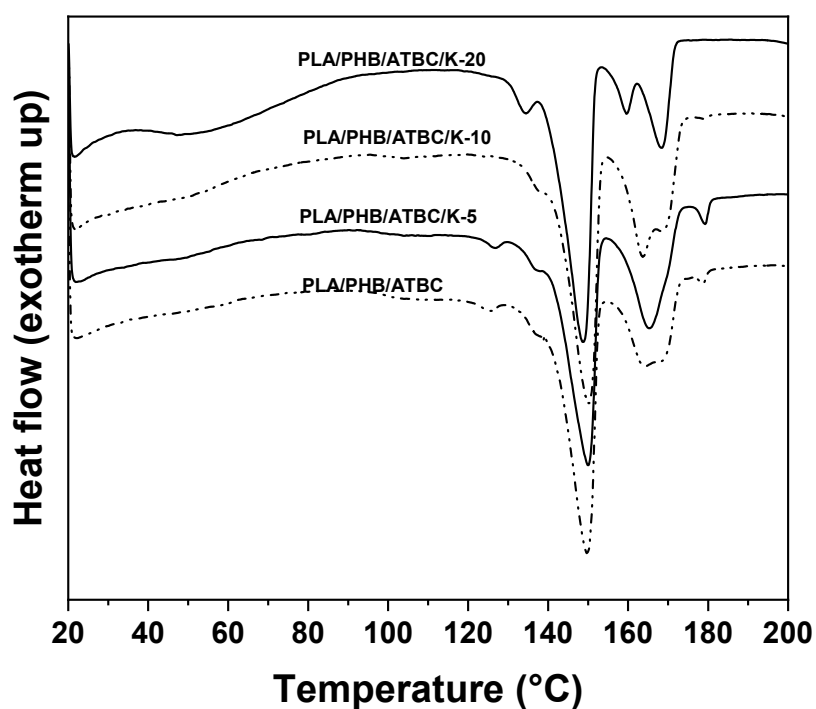

**Figure S5:** DSC second heating run of PLA/PHB/ATBC neat foil and keratin composites with varying keratin content from 5 to 20 wt% at the end of hydrolysis.

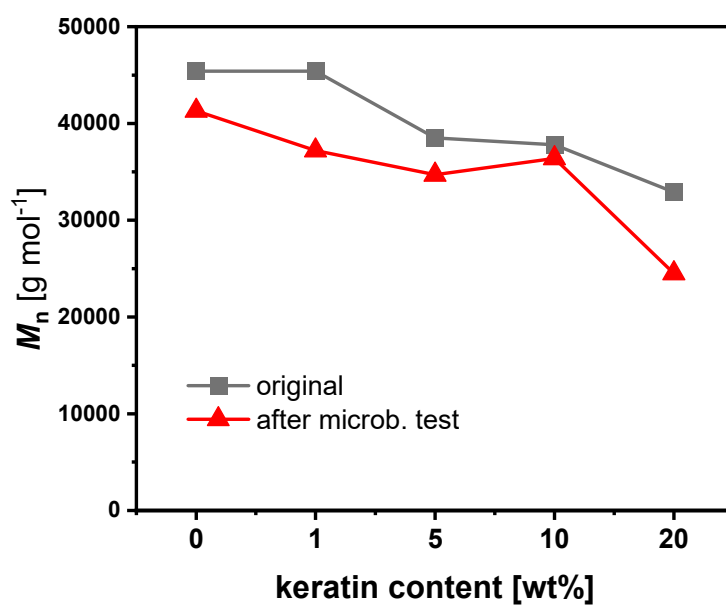

**Figure S6:** Average number molar masses of PLA/PHB/ATBC blend and its composites with varying keratin content from 1 to 20 wt% before and after the 1 month microbial test.
